# Supplementary material for: 2023 EULAR recommendations on imaging in diagnosis and management of crystal-induced arthropathies in clinical practice
Source: PubMed Central journal article supplement — Ann Rheum Dis. 2024 Feb 6;83(6):752–9. doi: 10.1136/ard-2023-224771 (PMC11103298; doi:10.1136/ard-2023-224771), 2024-02-06
Supplement: ard-2023-224771supp001.pdf [file ard-2023-224771supp001.pdf]

| Activity                                                                                                               | Required Resource  | Timeframe                                           | Audience                                                | Risk                                     | Indicator                                            |
|------------------------------------------------------------------------------------------------------------------------|--------------------|-----------------------------------------------------|---------------------------------------------------------|------------------------------------------|------------------------------------------------------|
| Scientific abstract at national and international rheumatology conferences, publication of recommendations and the SLR | NA                 | 12 months following approval by the EC              | Rheumatologists                                         | Information not reaching target audience | Number of independent citations in relevant journals |
| Scientific abstracts at national and international radiology conferences, and conferences on crystal/induced disease   | NA                 | 12 months following approval by the EC              | Radiologists, experts in crystal related disease        | Information not reaching target audience | Number of independent citations in relevant journals |
| Perform survey among rheumatologists and radiologists exploring the implementation of the recommendations              | Individual funding | 5-10 years following publication of main manuscript | Rheumatologists. Radiologists and general practitioners | Survey audience not being representative | Results of survey                                    |

**Supplementary Table. Implementation plan.** EC: EULAR Council; NA: not applicable
